# Supplementary material for: The Branchless Gene C lbl in Watermelon Encoding a Terminal Flower 1 Protein Regulate S the Number of Lateral Branch
Source: Research Square preprint supplement (doi:10.21203/rs.3.rs-487870/v1), 2021-05-17
Supplement: Supplementary file 1 [file c38dc035d3ba5884d7266349.xlsx]

## Sheet: Table S1
Supplementary Table 1, The segregation ratio of branch and branchless plants among different populations (WT20(P1)×WCZ(P2))
Populations	Branch individuals	Branchless individuals	Segregation Ratio	X2
Spring 2018 F2	236	79	3:1	0.001
Spring 2019 F2	1048	358	3:1	0.16
Spring 2020 BC1P1	113	0
Spring 2020 BC1P2	38	31	1:1	0.521

## Sheet: Table S2
Supplementary Table 2, The information of remaining important markers on chromosome 4 used to analysis the polymorphic
Marker Name	Digest(s)	Forward Sequence (5' To 3')	Reverse Sequence (5' To 3')	Position
ClCAPS055	HapII(C/CGG)	TGAAGCTTCCCTTGCCAGAA	TCAGGTGTGGTAAGGTTGAACT	21296500
ClCAPS062	TaqI(T/CGA)	AGAAGGGGTATAAGCTGAATTCA	AGATTCATTCCCATACAGCGTCA	21452340
ClCAPS073	HpaI(GTT/AAC)	TGACAATGATGCAAGGCAGC	TGGATTTTTCAGGGATGAGGAA	21878334
ClCAPS080	HindIII(A/AGCTT)	TGGGTCATCCTTTCCATGGTG	GCAATTTGCGGTCGACTACC	22840022
ClSNP018		TTGGCATGCCTTCTCATTCCT	TAGATCAGCCCGAGTTCCAT	21583500
ClSNP081		AGCAGGACTATAGGTGGCGA	CAGGAGCTGAGAGACCATCAC	21871384
ClSSR11589	(AGAAA)4	CAGTGCAGATCCTACTGCCA	AATGGGGCTGTTTCTGATTG	23841343..23842368
ClSSR11323	(TA)9	TTCCCAGCCTCATTTTCAAC	ATTGGGGAGTGTAAGAGGGG	21861065..21862094
ClSSR11314	(AAT)11	CGAGAGGTGCGTGTAAGCTA	GGTGTCAAATAAGTTCCTGCG	21800083..21801112
ClSSR11289	(TA)14	AACCGCTTATAAGTTCTCTTGACA	TGCGTGGTGGAGATATGAAA	21556340..21557366
ClSSR11292	(TTA)11	GGGAGATTGATGGGATAGCA	TAATGGTGGGACGTGTGATG	21581564..21582596
ClSSR11306	(TC)30	ACGCCTGAGAGGGATCTTTT	CACGAGCACTACTCCCAACA	21745877..21746903
ClSSR11280	(AT)12	TTAATTCATGTATGGCCGCA	GTAGGGTCCCAAGAAGTCCC	21522296..21523325
ClSSR11266	(AAT)14	TTGCAAAGACTTAGGAGCACA	CGAAAAGTTCTTGAGACGCC	21453739..21454771
ClSSR11278	(TA)9	TGGTACCGTAAAGCTACCCG	GCACCCTTAGCACCTTTGTC	21519167..21520199
ClSSR11279	(TA)12	TGGCATATTGCCCTTTCTTT	CGAGATGTCGGTAAAATGGC	21521200..21522223
ClSSR11268	(AAT)23	GATTAACGGTGCATATCAGGAG	TCAACCAGTGCATTTGAACC	21460320..21461345
ClSSR11270	(AT)11	ATCAAAGCAAAGCTAGGGCA	CGCCTCCCTCCTTTTTAGAT	21465840..21466875
ClSSR11264	(TTTC)6	TGAATGGGCTGTTTCCTTTC	TGCAAATGGAATTTGGGTTT	21437019..21438059
ClSSR11265	(GAA)9	CATTTCCCATTTGCTTTGCT	TATACCTCACCTTCCCCGC	21444492..21445521
ClSSR11231	(ATA)10	GGACGAAATCTGAAAAACGG	TCAACTTGTGTCCCAGCTATTTT	21295610..21296645
ClSSR11048	(AAAAATA)3	CTCCTTTCCTGGTGGACAAA	GGAAAATGAGACCGACATGA	20005346..20006372
dCAPS1	DdeI(C/TNAG)	CACGGTGAAGCTATTCTAGCTCA	TTGATGACCAAAACTCGATG	21607757
dCAPS2	EcoRI(G/AATTC)	ATATCAAATCTTCAGTATTCTGA	TTTTGTTTTGTTGCAAATGG	21617140
dCAPS11	SpeI(A/CTAGT)	AGGGTAATGAGAGGAGGAGAA	GGTCTAAAAAGTCCTTCCACTAG	21597534
Indel1		ACAATTTCGTCCCTGACTTT	ATCTTTTCCACGTTGAGGAC	21591532..21591553
dCAPS10	BclI(T/GATCA)	CTTGCAGCAGTTTCTCTTTGA	TGGGTGATGAGACAGGAAAAG	21588468
dCAPS13	BclI(T/GATCA)	GTAAACATCTCGAATTTGTTGATC	TTCTCGATGAAAACCCATGAC	21588843
dCAPS12	DdeI(C/TNAG)	TGCACACTACAATTTCGCATC	GAGAAAACTTGTTAAACCACTT	21582521

## Sheet: Table S3
Supplementary Table 3, The information of RT-PCR marker and in situ hybridization probes about candidate gene
Primer Name	Forward Sequence (5' To 3')	Reverse Sequence (5' To 3')	Product length
q-ClTFL1	GAAGAGTGATTGGAGATGTT	CATTGAGAACTTGCTTGTTG	84 bp
Actin	CCATGTATGTTGCCATCCAG	GGATAGCATGGGGTAGAGCA	140 bp
ClTFL1-SP6/T7	GATTTAGGTGACACTATAGAATGCTATTGACCCAGATGTTCCTGGC	TGTAATACGACTCACTATAGGGCGCCTCCTTGCAGCAGTTTC	311bp

## Sheet: Table S4
Supplementary Table 4, Detailed information of phylogenetic analysis in different varieties
Gene ID	Species	Genotype	Location	ORF length(bp)	Size(aa)	Exons
Cla018392	Citrullus lanatus	97103-v1	Chr04: 21588437 .. 21589801 (-)	525	174	4
Cla018465	Citrullus lanatus	97103-v1	Chr4 : 22329440 .. 22331184 (+)	531	176	4
Cla019450	Citrullus lanatus	97103-v1	Chr03 : 5361984 .. 5364151 (-)	525	174	4
Cla017699	Citrullus lanatus	97103-v1	Chr10 : 25326164 .. 25329575 (+)	531	176	4
Cla006196	Citrullus lanatus	97103-v1	Chr05 : 8150494 .. 8151292 (-)	324	107	4
Cla008648	Citrullus lanatus	97103-v1	Chr02 : 32300090 .. 32301298 (-)	453	150	4
Cla97C02G048220	Citrullus lanatus	97103-v2	Chr02 : 35824250 .. 35825545 (-)	540	179	4
CsGy6G012560	Cucumis sativus	Gy14	Chr06 : 10916658 .. 10918286 (-)	537	178	4
CsGy6G024900	Cucumis sativus	Gy14	Chr06 : 24628881 .. 24630265 (-)	549	182	4
CsGy3G032260	Cucumis sativus	Gy14	Chr03 : 31649358 .. 31652467 (-)	534	177	4
CsGy3G033940	Cucumis sativus	Gy14	Chr3 : 32790374 .. 32790964 (+)	204	67	3
CsGy3G033950	Cucumis sativus	Gy14	Chr3 : 32792984 .. 32794479 (+)	576	191	4
CsGy1G011560	Cucumis sativus	Gy14	Chr1 : 7245418 .. 7247134 (-)	525	174	4
Csa6G152360	Cucumis sativus	Chinese Long	Chr6 : 10805419 .. 10806685 (-)	531	176	4
Csa6G452100	Cucumis sativus	Chinese Long	Chr06 :21554312 .. 21555486 (-)	549	182	4
CsaV3.3G038840	Cucumis sativus	Chinese Long	Chr3 : 31943541 .. 31946078 (+)	531	176	4
CsaV3.1G011710	Cucumis sativus	Chinese Long	Chr1 : 7251368 .. 7254134 (-)	525	174	4
CsaV3.6G040640	Cucumis sativus	Chinese Long	Chr06 : 23541336 .. 23544270 (-)	1095	364	5
CsaV3.6G014990	Cucumis sativus	Chinese Long	Chr06 : 10904489 .. 10906163 (-)	537	178	4
CsaV3.3G016930	Cucumis sativus	Chinese Long	Chr03 : 12686165 .. 12687225 (-)	555	784	3
CsaV3.3G037190	Cucumis sativus	Chinese Long	Chr03 : 30774795 .. 30777910 (-)	534	177	4
MELO3C024540	Cucumis melo	DHL92	Chr08 : 9458696 .. 9460093 (+)	552	183	4
MELO3C021426	Cucumis melo	DHL92	Chr11 : 29558509 .. 29560090 (-)	228	75	3
MELO3C006888	Cucumis melo	DHL92	Chr06 : 6992359 .. 6993583 (-)	558	185	3
MELO3C009465	Cucumis melo	DHL92	Chr04 : 31915858 .. 31918586 (+)	489	162	3
MELO3C009627	Cucumis melo	DHL92	Chr04 : 30700379 .. 30702237 (-)	531	176	4
MELO3C002550	Cucumis melo	DHL92	Chr12 : 23288909 .. 23293053 (+)	525	174	4
MELO3C028498	Cucumis melo	DHL92	Chr00 : 21792271 .. 21792504 (+)	183	60	3
CmaCh14G003030	Cucurbita maxima	Rimu	Chr14 : 1339409 .. 1342140 (-)	525	174	4
CmaCh16G001390	Cucurbita maxima	Rimu	Chr16 : 610396 .. 611313 (+)	528	175	4
CmaCh07G008560	Cucurbita maxima	Rimu	Chr07 : 3993318 .. 3994627 (-)	528	175	4
CmaCh03G011600	Cucurbita maxima	Rimu	Chr03 : 7797993 .. 7798828 (+)	513	170	4
CmaCh20G001690	Cucurbita maxima	Rimu	Chr20 : 815998 .. 817199 (+)	531	176	4
CmoCh18G000480	Cucurbita moschata	Rifu	Chr18 : 307778 .. 309513 (+)	534	177	4
CmoCh18G000470	Cucurbita moschata	Rifu	Chr18 : 303589 .. 305664 (-)	534	177	4
CmoCh14G002940	Cucurbita moschata	Rifu	Chr14 : 1364092 .. 1366677 (-)	546	181	4
CmoCh20G001850	Cucurbita moschata	Rifu	Chr20 : 914665 .. 915673 (+)	531	176	4
CmoCh03G011500	Cucurbita moschata	Rifu	Chr03 : 9128809 .. 9130060 (+)	399	132	5
CmoCh16G001450	Cucurbita moschata	Rifu	Chr16 : 661491 .. 662614 (+)	531	176	4
Cp4.1LG09g11210	Cucurbita pepo	Zucchini	Cp4.1LG09 : 9643331 .. 9644754 (-)	534	177	4
Cp4.1LG20g04100	Cucurbita pepo	Zucchini	Cp4.1LG20 : 2290559 .. 2292108 (-)	528	175	4
Cp4.1LG14g06110	Cucurbita pepo	Zucchini	Cp4.1LG14 : 635199 .. 635560 (+)	276	91	3
Cp4.1LG03g00860	Cucurbita pepo	Zucchini	Cp4.1LG03 : 1341476 .. 1343895 (-)	525	174	4
Cp4.1LG19g05100	Cucurbita pepo	Zucchini	Cp4.1LG19 : 4114214 .. 4115947 (+)	474	157	3
Cp4.1LG10g04120	Cucurbita pepo	Zucchini	Cp4.1LG10 : 1650851 .. 1652186 (-)	570	189	5
Cp4.1LG16g08170	Cucurbita pepo	Zucchini	Cp4.1LG16 : 7847579 .. 7848315 (-)	453	150	4
Carg06619	Cucurbita argyrosperm	Silver-seed gourd	Scaffold012 : 21099 .. 22532 (+)	534	177	4
Carg21465	Cucurbita argyrosperm	Silver-seed gourd	Scaffold146 : 58029 .. 59303 (-)	330	109	4
Carg03680	Cucurbita argyrosperm	Silver-seed gourd	Scaffold006 : 1343946 .. 1346068 (+)	363	120	3
Carg05368	Cucurbita argyrosperm	Silver-seed gourd	Scaffold010 : 1434183 .. 1435657 (-)	528	175	4
Carg10475	Cucurbita argyrosperm	Silver-seed gourd	Scaffold098 : 387727 .. 388582 (-)	534	177	4
Carg15145	Cucurbita argyrosperm	Silver-seed gourd	Scaffold078 : 748246 .. 749309 (+)	531	176	4
Carg18429	Cucurbita argyrosperm	Silver-seed gourd	Scaffold161 : 193129 .. 193953 (+)	531	176	4
Bhi08G001546	Benincasa hispida	Wax gourd	Chr8 : 54504287 .. 54508545 (-)	525	174	4
Bhi08G001067	Benincasa hispida	Wax gourd	Chr8 : 39274695 .. 39276690 (-)	531	176	4
Bhi11G001635	Benincasa hispida	Wax gourd	Chr11 : 55395923 .. 55423235 (+)	318	105	3
Bhi03G001425	Benincasa hispida	Wax gourd	Chr3 : 38520827 .. 38522478 (+)	525	174	4
Bhi11G001634	Benincasa hispida	Wax gourd	Chr11 : 55290964 .. 55292003 (+)	186	91	2
Bhi11G001646	Benincasa hispida	Wax gourd	Chr11 : 55658037 .. 55666055 (-)	492	163	4
Bhi10G000029	Benincasa hispida	Wax gourd	Chr10 : 1032049 .. 1033739 (+)	540	179	4
Bhi11G001631	Benincasa hispida	Wax gourd	Chr11 : 55145989 .. 55146984 (-)	183	90	2
Bhi01G000982	Benincasa hispida	Wax gourd	Chr1 : 27095984 .. 27097053 (+)	528	175	4
AT5G03840	Arabidopsis thaliana	Columbia	Chr05 : 1024760.. 1025796 (-)	534	177	4
AT5G17690	Arabidopsis thaliana	Columbia	Chr05 : 5827142..5829755 (-)	1338	445	6
Solyc01g009560	Solanum lycopersicum	Heinz1706	Chr01 : 3814545..3813639 (-)	528	175	4
Solyc01g009580	Solanum lycopersicum	Heinz1706	Chr01 : 3828755..3830538 (+)	669	222	4
Solyc02g079290	Solanum lycopersicum	Heinz1706	Chr02 : 43905257..43906515 (+)	537	178	4
Solyc03g026050	Solanum lycopersicum	Heinz1706	Chr03 : 3455531..3456482 (+)	528	175	4
Solyc03g119100	Solanum lycopersicum	Heinz1706	Chr03 : 67800742..67799109 (-)	522	173	4
Solyc09g009560	Solanum lycopersicum	Heinz1706	Chr09 : 2968569..2971135 (+)	519	172	4

## Sheet: Table S5
Supplementary Table 5, The information of motif in figure S4
Color	Motif	E-value	Width
1	RSFFTLVMTDPDVPGPSDPYLREHLHWIVTDIPGTTDATFG	2.4e-1747	41
2	SRDNFNTRRFAAENDLGLPVAAVYFNAQRE	1.0e-1158	30
3	KEIVSYEGPKPNIGIHRFVFVLFKQKRRQ	3.6e-1060	29
4	EPLVVGRVIGDVVDMFTPTVKMSVTYNSK	7.6e-1051	29
5	QVANGHEFFPSFVSFKPRVEI	3.0e-670	21

## Sheet: Table S6
Supplementary Table 6, The primers used for constructing the vector
Primer Name	Digest(s)	Sequence
ClTFL1-pFGC5941-F	AscI(GG/CGCGCC)	TCAATTACCATGGGGCGCGCCATGGCAAGAAAAATAGCAGAACAGC
ClTFL1-pFGC5941-R	PacI(TTAAT/TAA)	TAGTCCCGGGTCTTAATTAACTATCGCCTCCTTGCAGCAGTT
pFGC5941-F		CTATCCTTCGCAAGACCCTTC
pFGC5941-R		CGGTAAGGATCTGAGCTACAC
